# Supplementary material for: Tenascin-C derived signaling induces neuronal differentiation in a three-dimensional peptide nanofiber gel
Source: Royal Society of Chemistry journal article supplement (doi:10.1039/c7bm00850c), 2018-01-01
Supplement: c7bm00850c1.pdf [file c7bm00850c1.pdf]

## Supporting Information

### **Tenascin-C Derived Signaling Induces Neuronal Differentiation in Three-Dimensional Peptide Nanofiber Gel**

Melike Sever<sup>†,‡</sup>, Gokhan Gunay<sup>§,‡</sup>, Mustafa O. Guler<sup>‡,\*</sup> and Ayse B. Tekinay<sup>†,§,\*</sup>

<sup>†</sup>Institute of Materials Science and Nanotechnology, National Nanotechnology Research Center (UNAM), Bilkent University, Ankara 06800, Turkey

<sup>§</sup>Neuroscience Graduate Program, Bilkent University, Ankara 06800, Turkey

<sup>‡</sup>The Institute for Molecular Engineering, The University of Chicago, Chicago, IL 60637 United States

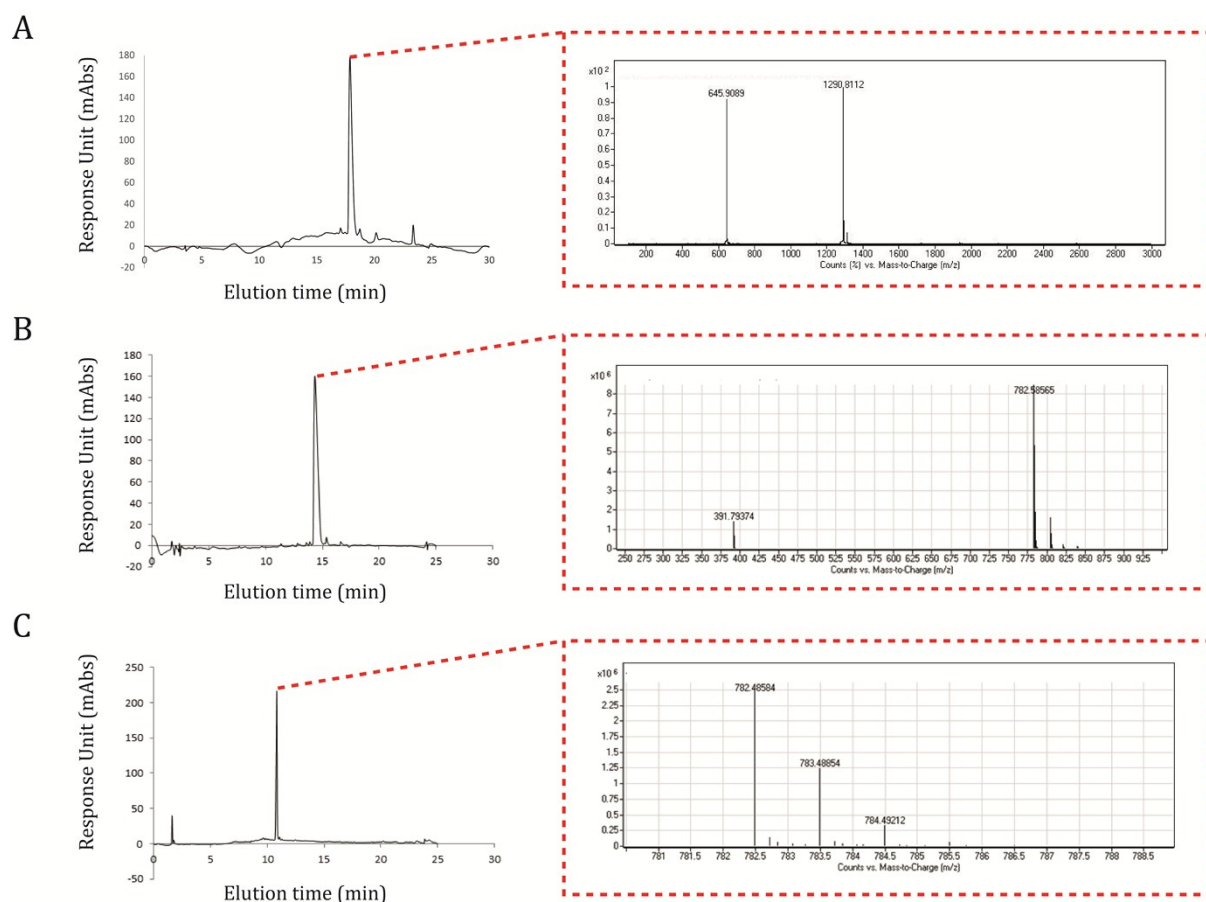

**Figure S1** Liquid chromatography and mass spectrometry of TN-PA (A), KK-PA (B) and EE-PA (C). Mass spectrometry of TN-PA (a)  $[M+H]^+$  (calculated): 1290.81,  $[M+H]^+$  (observed): 1290.81,  $[M+2H]^{+2/2}$  (calculated): 645.91,  $[M+2H]^{+2/2}$  (observed): 645.91. Mass spectrometry of KK-PA;  $[M+H]^+$  (calculated): 782.58,  $[M+H]^+$  (observed): 782.59,  $[M+2H]^{+2/2}$  (calculated): 391.79,  $[M+2H]^{+2/2}$  (observed): 391.79. Mass spectrometry of EE-PA;  $[M-H]^-$  (calculated): 782.47,  $[M-H]^-$  (observed): 782.48.

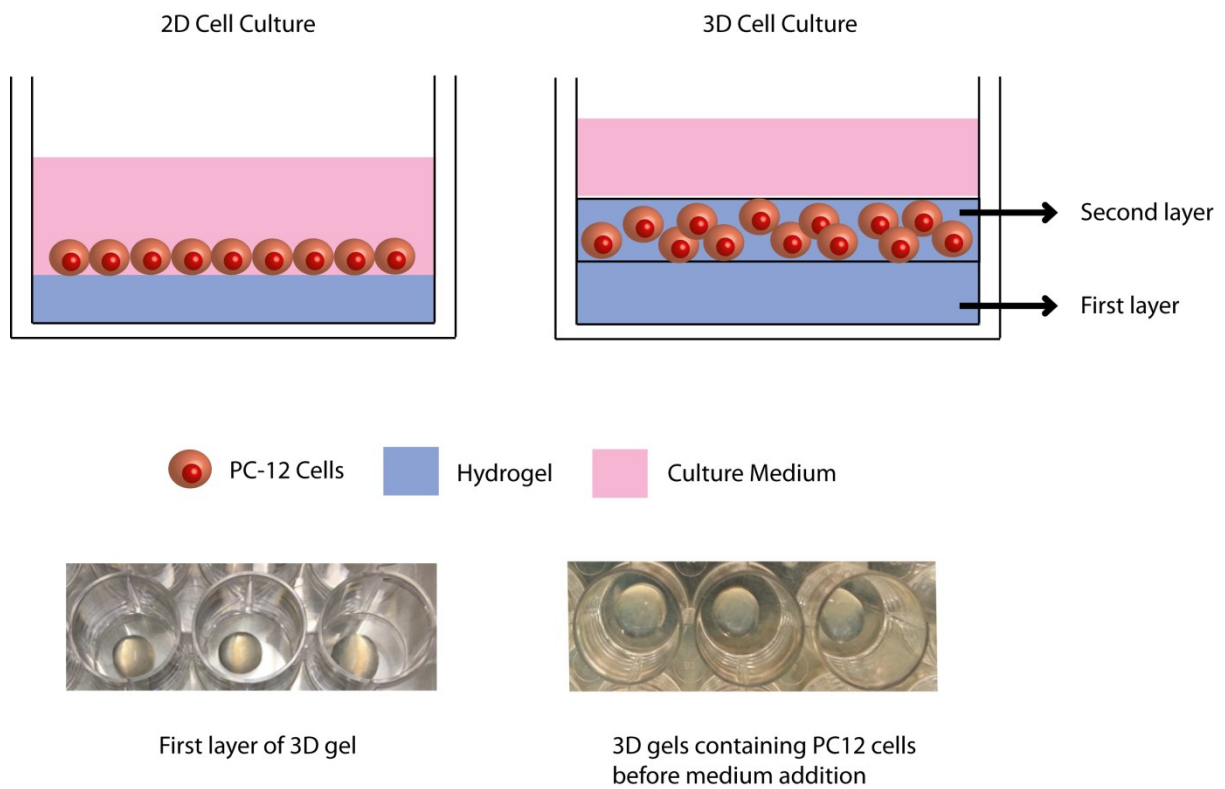

**Figure S2** *In vitro* experimental design.

**Table S1** Experimental Groups

| 3D                           |                              | 2D                         |                            |
|------------------------------|------------------------------|----------------------------|----------------------------|
| +NGF                         | -NGF                         | +NGF                       | -NGF                       |
| PA-TN/PA-EE<br>(12 mM/6 mM)  | PA-TN/PA-EE<br>(12 mM/6 mM)  | PA-TN/PA-EE<br>(4 mM/2 mM) | PA-TN/PA-EE<br>(4 mM/2 mM) |
| PA-KK/PA-EE<br>(10 mM/10 mM) | PA-KK/PA-EE<br>(10 mM/10 mM) | PA-KK/PA-EE<br>(3 mM/3 mM) | PA-KK/PA-EE<br>(3 mM/3 mM) |

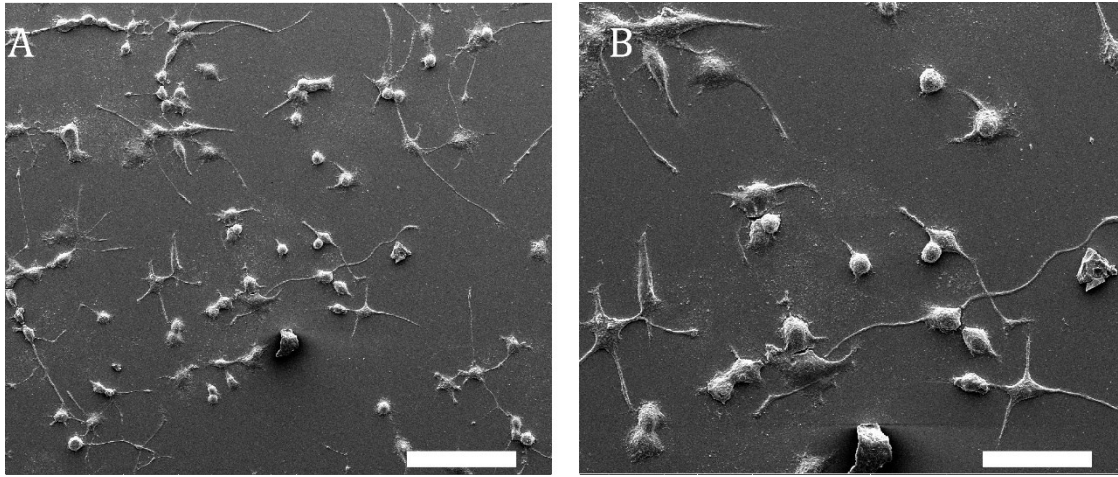

**Figure S3.** SEM images of PC12 cells on 2D poly-D-lysine coated surfaces in the presence of NGF on day 7 (Scale bars: 100 µm (A) and 50 µm (B)).

**Table S2** Primers Used for qRT-PCR Expression Analysis

| Gene          | Forward Primer       | Reverse Primer       | Product Size (bp) |
|---------------|----------------------|----------------------|-------------------|
| GAPDH         | GTGCCAGCCTCGTTCATA   | AACTTGCCGTGGGTAGAGTC | 186               |
| β-III Tubulin | CCTGCCTCTTCGTCTCTAGC | AACTTGGCCCCTATCTGGTT | 222               |
| SYN1          | CCAGCTCAACAAATCCCAGT | TGGTCTCAGCTTTCACCTCA | 307               |

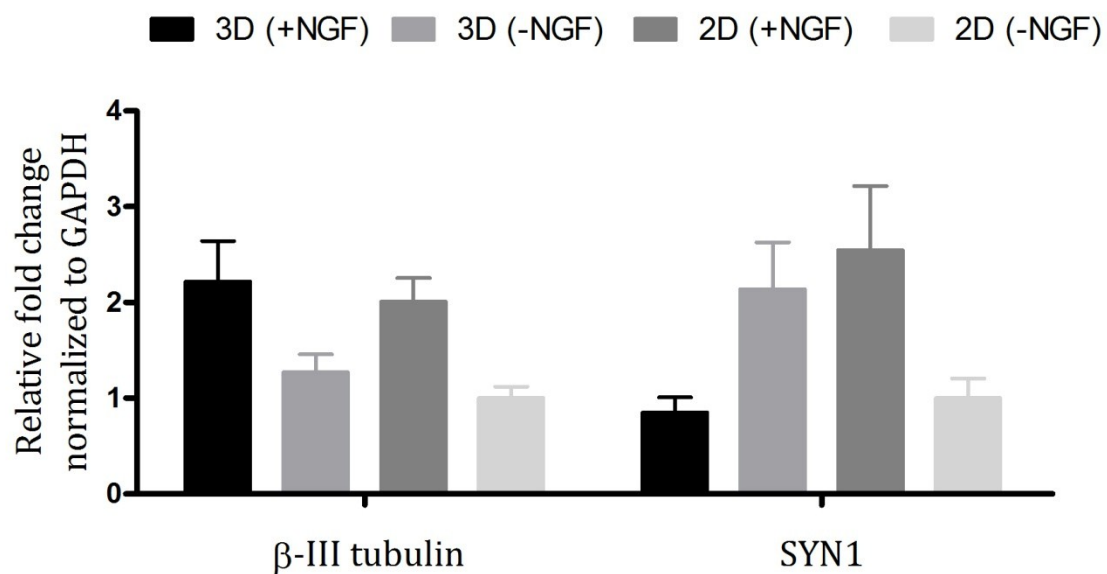

**Figure S4** Gene expression analyses of  $\beta$ -III tubulin and Synaptophysin I (SYN1) on day 3 on 2D TN-PA/EE-PA nanofibers and in 3D TN-PA/EE-PA hydrogels with and without the addition of NGF. Expression level of each gene was normalized to GAPDH. Values represent mean  $\pm$  sem.

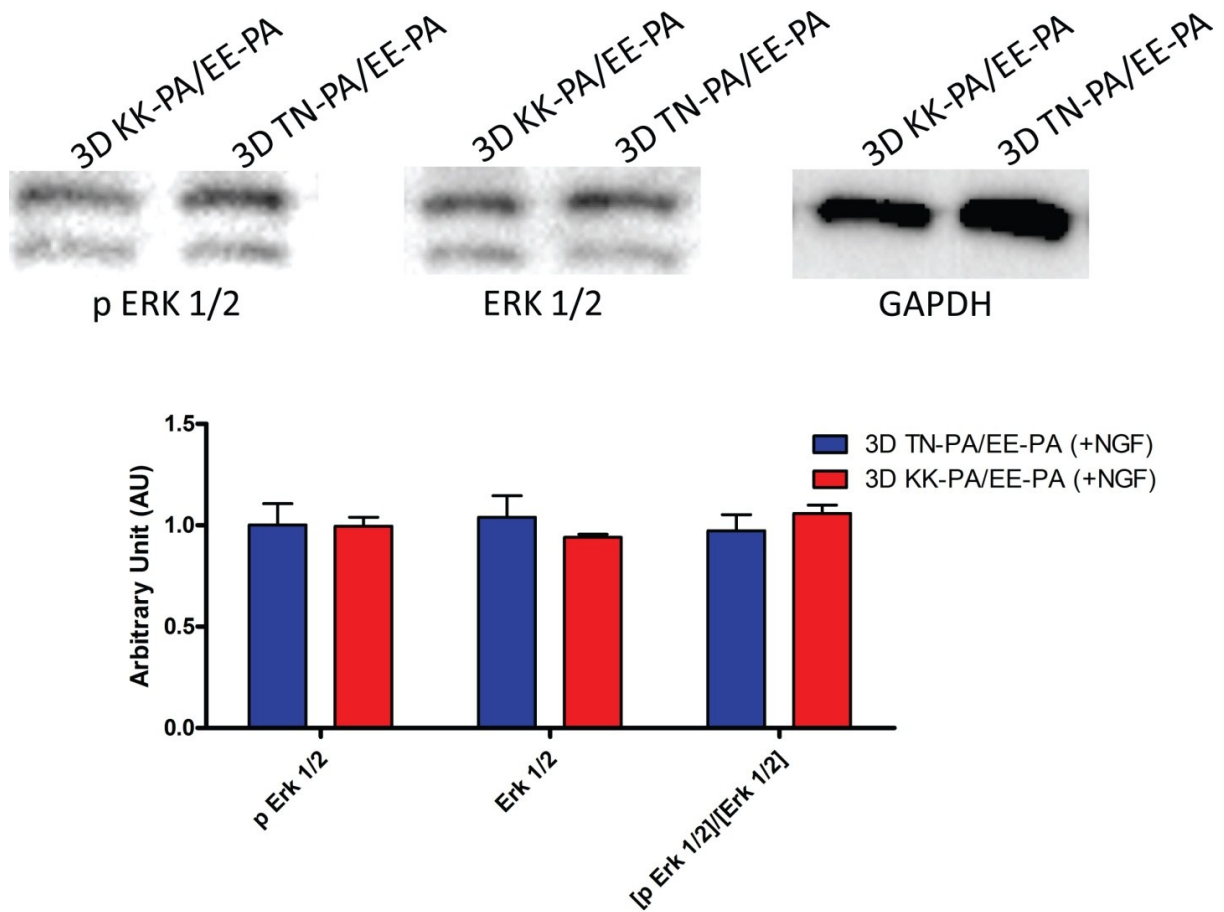

**Figure S5** Western blot analysis of ERK phosphorylation (p ERK) and total ERK expression. Values represent mean  $\pm$  sem.
